# Supplementary material for: An ADAMTS3 missense variant is associated with Norwich Terrier upper airway syndrome
Source: PLoS Genet. 2019 May 16;15(5):e1008102. doi: 10.1371/journal.pgen.1008102 (PMC6521993; doi:10.1371/journal.pgen.1008102)
Supplement: S2 Table — Variants passing filtering criteria when aligned to the CanFam3.1 and new consensus (Zoey2.3) assemblies. (XLSX) [file pgen.1008102.s007.xlsx]

## Sheet: CanFam3.1
Chromosome	Position (bp)	Reference	Alternate	METHYLATION_QuMammal2017	METHYLATION_Carnoma2014	CpG	CAGE_robust_peaks	Improved_CanFam_Antisense	Improved_CanFam_lincRNA	Improved_CanFam_Unclassified_noncoding_RNA	miRNA	Improved_CanFam_Protein	ORegAnno	Notes
13	61170181	A	G	0	1	0	0	0	0	0	0	0	0
13	61189929	A	G	0	0	0	0	0	0	0	0	0	0
13	61190053	A	G	0	0	0	0	0	0	0	0	0	0
13	61190184	T	C	0	0	0	0	0	0	0	0	0	0
13	61190246	C	G	0	0	0	0	0	0	0	0	0	0
13	61190348	AATG	TATT	0	0	0	0	0	0	0	0	0	0
13	61190752	CCTCT	CCT,C	0	0	0	0	0	0	0	0	0	0
13	61190789	GGTGAATAAAC	CGTGAATAAAT,TGTGAATAAAT	0	0	0	0	0	0	0	0	0	0
13	61191362	T	A	0	0	0	0	0	0	0	0	0	0
13	61191408	GAGA	G	0	0	0	0	0	0	0	0	0	0
13	61191554	T	C	0	0	0	0	0	0	0	0	0	0
13	61191750	A	G	0	0	0	0	0	0	0	0	0	0
13	61192115	C	T	0	0	0	0	0	0	0	0	0	0
13	61192271	A	T	0	0	0	0	0	0	0	0	0	0
13	61192476	G	A	0	0	0	0	0	0	0	0	0	0
13	61192504	G	A	0	0	0	0	0	0	0	0	0	0
13	61192540	G	T	0	0	0	0	0	0	0	0	0	0
13	61193292	T	C	0	0	0	0	0	0	0	0	0	0
13	61193340	G	C	0	0	0	0	0	0	0	0	0	0
13	61193366	G	T	0	0	0	0	0	0	0	0	0	0
13	61193672	C	A	0	0	0	0	0	0	0	0	0	0
13	61193693	G	T	0	0	0	0	0	0	0	0	0	0
13	61193761	C	T	0	0	0	0	0	0	0	0	0	0
13	61194302	C	T	0	0	0	0	0	0	0	0	0	0
13	61194342	C	T	0	0	0	0	0	0	0	0	0	0
13	61194542	G	A	0	0	0	0	0	0	0	0	0	0
13	61194604	G	A	0	0	0	0	0	0	0	0	0	0
13	61194613	CCTTTTTT	C	0	0	0	0	0	0	0	0	0	0
13	61195300	A	G	0	0	0	0	0	0	0	0	0	0
13	61195437	C	A	0	0	0	0	0	0	0	0	0	0
13	61195466	A	G	0	0	0	0	0	0	0	0	0	0
13	61195503	C	T	0	0	0	0	0	0	0	0	0	0
13	61195570	A	T	0	0	0	0	0	0	0	0	0	0
13	61195787	TTTTTTTTTTTTTA	TATTTTTTTTTA	0	0	0	0	0	0	0	0	0	0
13	61195847	T	TTT	0	0	0	0	0	0	0	0	0	0
13	61195902	TCAAAACCTA	CCAAAACCTT	0	0	0	0	0	0	0	0	0	0
13	61195965	G	A	0	0	0	0	0	0	0	0	0	0
13	61196420	A	C	0	0	0	0	0	0	0	0	0	0
13	61196508	AG	GA,GG	0	0	0	0	0	0	0	0	0	0
13	61197002	C	T	0	0	0	0	0	0	0	0	0	0
13	61197349	C	T	0	0	0	0	0	0	0	0	0	0
13	61197483	A	G	0	0	0	0	0	0	0	0	0	0
13	61197836	T	C	0	0	0	0	0	0	0	0	0	0
13	61197933	A	AT	0	0	0	0	0	0	0	0	0	0
13	61197997	TAACTG	CAACTA	0	0	0	0	0	0	0	0	0	0
13	61198419	G	A	0	0	0	0	0	0	0	0	0	0
13	61205561	G	GT,GTT	0	0	0	0	0	0	0	0	0	0
13	61207979	G	T	0	0	0	0	0	0	0	0	0	0
13	61208736	G	A	0	0	0	0	0	0	0	0	0	0
13	61210349	G	T	0	0	0	0	0	0	0	0	0	0
13	61212738	T	A	0	1	0	0	0	0	0	0	0	0
13	61212777	GGT	G,GGTGTGT,GGTGTGTGT	0	1	0	0	0	0	0	0	0	0
13	61213741	C	T	0	1	0	0	0	0	0	0	0	0
13	61213959	G	A	0	1	0	0	0	0	0	0	0	0
13	61214054	AAT	A	0	1	0	0	0	0	0	0	0	0
13	61215142	G	C	0	1	0	0	0	0	0	0	0	0
13	61216135	CG	C	0	1	0	0	0	0	0	0	0	0
13	61216488	A	T	0	1	0	0	0	0	0	0	0	0
13	61218653	G	A	0	1	0	0	0	0	0	0	0	0
13	61219883	TTTTG	T	0	1	0	0	0	0	0	0	0	0
13	61220575	C	G	0	0	0	0	0	0	0	0	0	0
13	61220670	A	G	0	0	0	0	0	0	0	0	0	0
13	61221130	C	G	0	0	0	0	0	0	0	0	0	0
13	61221146	C	T	0	0	0	0	0	0	0	0	0	0
13	61221333	AAATAAATG	A	0	0	0	0	0	0	0	0	0	0
13	61221608	A	G	0	0	0	0	0	0	0	0	0	0
13	61221652	AGAAAATAATATTAG	CGAAAATAATATTAA	0	0	0	0	0	0	0	0	0	0
13	61222124	G	C	0	0	0	0	0	0	0	0	0	0
13	61222427	TGTATAACGTT	TATAACGC	0	0	0	0	0	0	0	0	0	0
13	61224152	A	G	0	0	0	0	0	0	0	0	0	0
13	61226001	G	A	0	0	0	0	0	0	0	0	0	0
13	61227517	C	T	0	0	0	0	0	0	0	0	0	0
13	61227956	A	C	0	0	0	0	0	0	0	0	0	0
13	61228172	C	T	0	0	0	0	0	0	0	0	0	0
13	61228229	T	C	0	0	0	0	0	0	0	0	0	0
13	61228323	G	A	0	0	0	0	0	0	0	0	0	0
13	61228409	T	C	0	0	0	0	0	0	0	0	0	0
13	61228496	TATAG	T	0	0	0	0	0	0	0	0	0	0
13	61228702	AAATAAAAAAATAAAAAAAT	TAAAAAAAAATTAAAAAAAA	0	0	0	0	0	0	0	0	0	0
13	61228935	G	GTT,GTTT	0	0	0	0	0	0	0	0	0	0
13	61229680	G	A	0	0	0	0	0	0	0	0	0	0
13	61230145	G	T	0	0	0	0	0	0	0	0	0	0
13	61230167	A	G	0	0	0	0	0	0	0	0	0	0
13	61230191	T	TA	0	0	0	0	0	0	0	0	0	0
13	61230651	C	A	0	0	0	0	0	0	0	0	0	0
13	61231263	G	C	0	0	0	0	0	0	0	0	0	0
13	61241538	T	C	0	1	0	0	0	0	0	0	0	0
13	61243071	T	TA	0	0	0	0	0	0	0	0	0	0
13	61244812	C	T	1	0	0	0	0	0	0	0	0	0
13	61244832	T	A,C	1	0	0	0	0	0	0	0	0	0
13	61244946	G	C	1	0	0	0	0	0	0	0	0	0
13	61245474	T	C	0	0	0	0	0	0	0	0	0	0
13	61246597	G	A	0	0	0	0	0	0	0	0	0	0
13	61247277	T	A	0	0	0	0	0	0	0	0	0	0
13	61247324	G	C	0	0	0	0	0	0	0	0	0	0
13	61248328	T	G	0	0	0	0	0	0	0	0	0	0
13	61248415	C	CT	0	0	0	0	0	0	0	0	0	0
13	61250069	AT	A	0	0	0	0	0	0	0	0	0	0
13	61250267	A	C	0	0	0	0	0	0	0	0	0	0
13	61250391	C	T	0	0	0	0	0	0	0	0	0	0
13	61251419	TGGAGGGAGGGAGAGAGGGAG	T,TGGAGGGAGGGAGGGAGGGAGAGAGGGAG	0	0	0	0	0	0	0	0	0	0
13	61252577	C	T	0	1	0	0	0	0	0	0	0	0
13	61252689	TCTG	T	0	1	0	0	0	0	0	0	0	0
13	61252910	A	AG	0	1	0	0	0	0	0	0	0	0
13	61254081	CATGT	AATGG	0	1	0	0	0	0	0	0	0	0
13	61255943	A	G	0	1	0	0	0	0	0	0	0	0
13	61256419	T	A	0	1	0	0	0	0	0	0	0	0
13	61258164	AGTGGCCTAA	GGTGGCCTAA,GGTGGCCTAC	0	0	0	0	0	0	0	0	0	0
13	61258363	T	C	0	0	0	0	0	0	0	0	0	0
13	61258744	C	T	0	0	0	0	0	0	0	0	0	0
13	61258774	CTT	C	0	0	0	0	0	0	0	0	0	0
13	61258868	T	G	0	0	0	0	0	0	0	0	0	0
13	61258906	ATGA	TCTT	0	0	0	0	0	0	0	0	0	0
13	61259076	T	G	0	0	0	0	0	0	0	0	0	0
13	61259876	C	A	0	0	0	0	0	0	0	0	0	0
13	61262188	T	C	0	0	0	0	0	0	0	0	0	0
13	61262517	AG	CA,CG	0	0	0	0	0	0	0	0	0	0
13	61262834	G	C,T	0	0	0	0	0	0	0	0	0	0
13	61263699	A	T	0	0	0	0	0	0	0	0	0	0
13	61263848	A	G	0	0	0	0	0	0	0	0	0	0
13	61264085	TAAGTTAGAAGATAG	CAAGTTAGAAGATAA	0	0	0	0	0	0	0	0	0	0
13	61264492	C	G	0	0	0	0	0	0	0	0	0	0
13	61265325	G	T	0	0	0	0	0	0	0	0	0	0
13	61265383	AAG	GAA	0	0	0	0	0	0	0	0	0	0
13	61267404	C	T	0	0	0	0	0	0	0	0	0	0
13	61271979	T	C	0	0	0	0	0	0	0	0	0	0
13	61272088	T	G	0	0	0	0	0	0	0	0	0	0
13	61272563	CACAA	TACAA,TACAT	0	0	0	0	0	0	0	0	0	0
13	61272600	T	C	0	0	0	0	0	0	0	0	0	0
13	61274339	C	T	0	0	0	0	0	0	0	0	0	0
13	61274752	AATGGGC	GATGGGC,GATGGGT	0	0	0	0	0	0	0	0	0	0
13	61274854	G	GA	0	0	0	0	0	0	0	0	0	0
13	61274950	C	T	0	0	0	0	0	0	0	0	0	0
13	61276616	ACT	A	0	0	0	0	0	0	0	0	0	0
13	61276989	TGACAAATAAAC	AGACAAATAAAA,AGACAAATAAAC	0	0	0	0	0	0	0	0	0	0
13	61278501	C	T	0	0	0	0	0	0	0	0	1	0	ADAMTS3 3'UTR
13	61281451	C	G	0	0	0	0	0	0	0	0	0	0
13	61281492	G	A	0	0	0	0	0	0	0	0	0	0
13	61281530	C	T	0	0	0	0	0	0	0	0	0	0
13	61281624	CATTAGAAACAACAAATACCCAC	TATTAGAAATGACAAATACCCGA	0	0	0	0	0	0	0	0	0	0
13	61281694	A	G	0	0	0	0	0	0	0	0	0	0
13	61282730	CATGGCAAGA	TATGGCAAGG	0	0	0	0	0	0	0	0	0	0
13	61282879	T	TAAA	0	0	0	0	0	0	0	0	0	0
13	61283039	T	TTTTTATTTTATTTATTTTATTTTA	0	0	0	0	0	0	0	0	0	0
13	61283136	T	TTTTTTGTTG,TTTTTTTGTTGTTG	0	0	0	0	0	0	0	0	0	0
13	61283508	GGAAAAA	GAG	0	0	0	0	0	0	0	0	0	0
13	61284432	C	A	0	0	0	0	0	0	0	0	0	0
13	61285186	T	C	0	0	0	0	0	0	0	0	0	0
13	61285305	T	TAA,TA	0	0	0	0	0	0	0	0	0	0
13	61286095	AATTTTT	A	0	0	0	0	0	0	0	0	0	0
13	61286424	A	G	0	0	0	0	0	0	0	0	0	0
13	61286641	G	T	0	0	0	0	0	0	0	0	1	0	ADAMTS3 synonymous, ENSCAFG00000002956 (novel gene)
13	61287796	G	A	0	0	0	0	0	0	0	0	1	0	ENSCAFG00000002956 (novel gene)
13	61287813	A	T	0	0	0	0	0	0	0	0	1	0	ENSCAFG00000002956 (novel gene)
13	61290789	T	C	0	0	0	0	0	0	0	0	0	0
13	61306616	ATT	A,AT	0	0	0	0	0	0	0	0	0	0
13	61331648	T	A	0	0	0	0	0	0	0	0	0	0
13	61373554	CGTTT	CGTTTGTTT,C	0	0	0	0	0	0	0	0	0	0
13	61376126	CGCAT	C	0	0	0	0	0	0	0	0	0	0
13	61376261	CACAAATATTGT	GACAAATATTGC,GACAAGTATTGT	0	0	0	0	0	0	0	0	0	0
13	61376333	C	CAGAG	0	0	0	0	0	0	0	0	0	0
13	61377534	CTGGTTGTG	TTGGTTGTA	0	0	0	0	0	0	1	0	0	0	CFRNASEQ_UC_00032145
13	61377776	T	C	0	0	0	0	0	0	1	0	0	0	CFRNASEQ_UC_00032145
13	61378126	G	A	0	0	0	0	0	0	0	0	0	0
13	61378382	C	T	0	0	0	0	0	0	0	0	0	0
13	61381005	TTCTC	TCTCTC,T	0	0	0	0	0	0	0	0	0	0
13	61381205	T	A	0	0	0	0	0	0	0	0	0	0
13	61381670	T	A	0	0	0	0	0	0	0	0	0	0
13	61382048	T	TAA	0	0	0	0	0	0	0	0	0	0
13	61384776	TGTGGGGGTGAATGGGTGACG	GGTGGGGGTGACTGGGTGACC,GGTGGGGGTGACTGGGTGACG	0	0	0	0	0	0	0	0	0	0
13	61385160	T	TTTTA	0	0	0	0	0	0	0	0	0	0
13	61392816	CGTTTAGTGGTTTGGCG	GGCTTAGTGGTTTGGCA,GGCTTAGTGGTTTGGCG,GGCTTAGTGGTTTGGTG	0	0	0	0	0	0	0	0	0	0
13	61393645	T	C	0	0	0	0	0	0	0	0	0	0
13	61394050	G	T	0	0	0	0	0	0	0	0	0	0
13	61394062	G	A	0	0	0	0	0	0	0	0	0	0
13	61394068	GAAGA	G	0	0	0	0	0	0	0	0	0	0
13	61394075	C	A	0	0	0	0	0	0	0	0	0	0
13	61406265	CTT	C	0	0	0	0	0	0	0	0	0	0
13	61407704	TGTTCAGAA	CGTTCAGAA,CGTTCAGAC	0	0	0	0	0	0	0	0	0	0
13	61407920	A	G	0	0	0	0	0	0	0	0	0	0
13	61407998	G	T	0	0	0	0	0	0	0	0	0	0
13	61408820	G	A	0	0	0	0	0	0	0	0	0	0
13	61411415	C	T	0	0	0	0	0	0	1	0	0	0	CFRNASEQ_UC_00032148
13	61412572	G	GA	0	0	0	0	0	0	0	0	0	0
13	61415543	T	C	0	0	0	0	0	0	1	0	0	0	CFRNASEQ_UC_00032149
13	61415634	TTTTTTTTTTT	GTTTTGTTTTG	0	0	0	0	0	0	1	0	0	0	CFRNASEQ_UC_00032149
13	61415991	G	A	0	0	0	0	0	0	1	0	0	0	CFRNASEQ_UC_00032149
13	61416503	G	GT	0	0	0	0	0	0	0	0	0	0
13	61419324	TTTC	T	0	0	0	0	0	0	0	0	0	0
13	61420218	C	CAATAAATAAATA,CAATAAATAAATAAATA	0	0	0	0	0	0	0	0	0	0
13	61420225	CAAAC	TAAAC,TAAAT	0	0	0	0	0	0	0	0	0	0
13	61421201	TA	TAA,T	0	0	0	0	0	0	0	0	0	0
13	61422615	T	C	0	0	0	0	0	0	0	0	0	0
13	61428232	G	A	0	0	0	0	0	0	0	0	0	0
13	61428302	G	A	0	0	0	0	0	0	0	0	0	0
13	61428495	G	A	0	0	0	0	0	0	0	0	0	0
13	61429847	A	AAGAGAGAGAG,AAGAGAGAGAGAGAGAG	0	0	0	0	0	0	0	0	0	0
13	61431382	GCCTGCAGCCA	ACCTGCAGCCG	0	0	0	0	0	0	0	0	0	0
13	61433428	TGATTCAAT	CGATTCAAC	0	0	0	0	0	0	0	0	0	0
13	61434837	CA	C	0	0	0	0	0	0	0	0	0	0
13	61437360	C	A	0	0	0	0	0	0	0	0	0	0
13	61438274	C	T	0	0	0	0	0	0	0	0	0	0
13	61439951	G	GA	0	0	0	0	0	0	0	0	0	0
13	61440216	C	CAT	0	0	0	0	0	0	0	0	0	0
13	61440933	C	A	0	0	0	0	0	0	0	0	0	0
13	61441283	AG	CT	0	0	0	0	0	0	0	0	0	0
13	61441819	T	C	0	0	0	0	0	0	0	0	0	0
13	61442856	AT	A	0	0	0	0	0	0	0	0	0	0
13	61443055	TAA	TAAA,T	0	0	0	0	0	0	0	0	0	0
13	61443079	A	AT	0	0	0	0	0	0	0	0	0	0
13	61443476	C	T	0	0	0	0	0	0	0	0	0	0
13	61444195	CTGACCCTTT	TTGACCCTTG	0	0	0	0	0	0	0	0	0	0
13	61445225	C	G	0	0	0	0	0	0	0	0	0	0
13	61445273	T	A	0	0	0	0	0	0	0	0	0	0
13	61445408	C	T	0	0	0	0	0	0	0	0	0	0
13	61445463	A	G	0	0	0	0	0	0	0	0	0	0
13	61446470	G	A	0	0	0	0	0	0	0	0	0	0
13	61448221	G	A	0	0	0	0	0	0	0	0	0	0
13	61448429	G	A	0	0	0	0	0	0	0	0	0	0
13	61448704	G	A	0	0	0	0	0	0	0	0	0	0
13	61449347	C	T	0	0	0	0	0	0	0	0	0	0
13	61449742	C	T	0	0	0	0	0	0	0	0	0	0
13	61449822	A	G	0	0	0	0	0	0	0	0	0	0
13	61449918	TGCCATGAGGACCG	CGCCATGAGGACCA	0	0	0	0	0	0	0	0	0	0
13	61460566	G	C	0	0	0	0	0	0	0	0	0	0
13	61461747	GGATAGATA	G,GGATAGATAGATA	0	0	0	0	0	0	0	0	0	0
13	61462213	TTTTTTTTTT	ATTTTTTTTA	0	0	0	0	0	0	0	0	0	0
13	61462620	T	C	0	0	0	0	0	0	0	0	0	0
13	61462680	GATCCCCAGGTTAAGATC	AATTCCCAGGTTAAGATT	0	0	0	0	0	0	0	0	0	0
13	61463119	G	A	0	0	0	0	0	0	0	0	0	0
13	61492288	TCTAGTACATTT	ACTAGTACATTC,ACTAGTACATTT	0	0	0	0	0	0	0	0	0	0
